# Supplementary material
Source: Springer Nature journal article supplement (https://www.springermedizin.de/resource/supplementary/12889_2009_3035_MOESM2_ESM.pdf/9487894)

## Response rates

## Dropout (men/women)

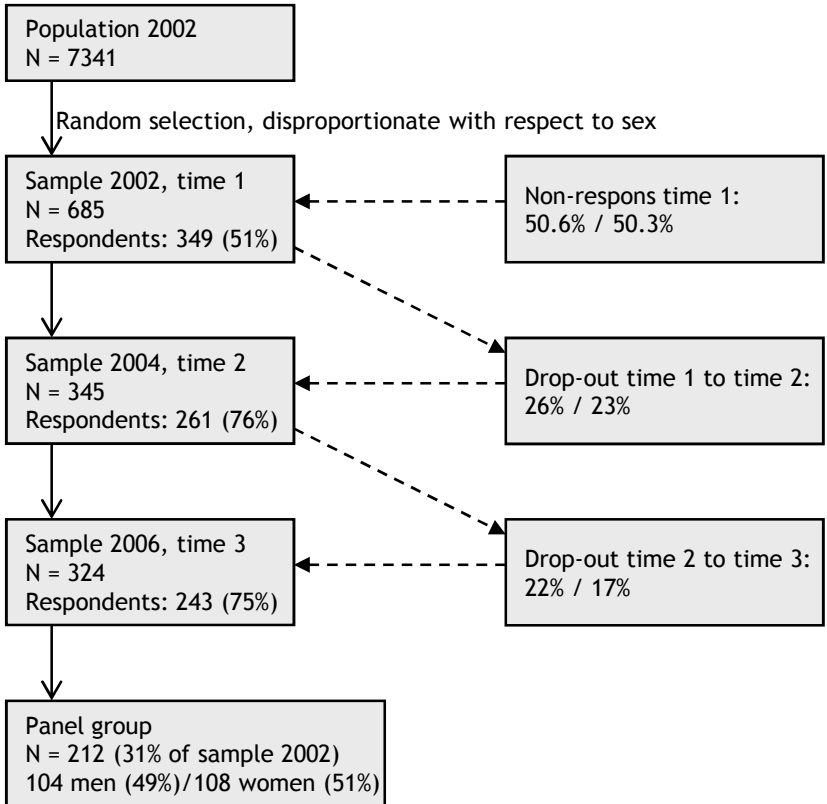

Supplement: MOESM2 [file 9487894]
